# Supplementary material for: Lignin-derived materials and their applications in rechargeable batteries
Source: Royal Society of Chemistry journal article supplement (doi:10.1039/d1gc02872c), 2021-12-14
Supplement: d1gc02872c1.pdf [file d1gc02872c1.pdf]

## Supporting Information

**Table S1.** Performance comparison of rechargeable batteries employed with lignin-derived materials.

| Types of rechargeable batteries | Served component in batteries           | Employed lignin                 | Pivotal adopted strategies                                 | ICE (%)                           | Capacity retention (%)                        | Rate capability                                   | Ref. |
|---------------------------------|-----------------------------------------|---------------------------------|------------------------------------------------------------|-----------------------------------|-----------------------------------------------|---------------------------------------------------|------|
| LIB                             | porous carbon as anode active materials | steam explosion alkaline lignin | KOH activation                                             | 41.6<br>(200 mA g <sup>-1</sup> ) | 60.0<br>(400 cycles, 200 mA g <sup>-1</sup> ) | 1000 mA g <sup>-1</sup> , 268 mAh g <sup>-1</sup> | 1    |
|                                 |                                         | enzymatic hydrolysis lignin     | ZnCO <sub>3</sub> activation                               | 54.9<br>(200 mA g <sup>-1</sup> ) | 99.0<br>(10000 cycles, -)                     | 1000 mA g <sup>-1</sup> , 423 mAh g <sup>-1</sup> | 2    |
|                                 |                                         | sodium lignosulfonate           | pre-oxidation treatment                                    | 44.3<br>(50 mA g <sup>-1</sup> )  | 60.0<br>(400 cycles, 500 mA g <sup>-1</sup> ) | 5000 mA g <sup>-1</sup> , 32 mAh g <sup>-1</sup>  | 3    |
|                                 |                                         | enzymatic hydrolysis lignin     | K <sub>2</sub> CO <sub>3</sub> activation at 900°C         | 37.0<br>(200 mA g <sup>-1</sup> ) | 78.9<br>(200 cycles, 200 mA g <sup>-1</sup> ) | 1000 mA g <sup>-1</sup> , 223 mAh g <sup>-1</sup> | 4    |
|                                 |                                         | sodium lignosulfonate           | in situ polymerization of 2-ethylaniline                   | 46.5<br>(60 mA g <sup>-1</sup> )  | 86.5<br>(20 cycles, 100 mA g <sup>-1</sup> )  | -                                                 | 5    |
|                                 |                                         | without details                 | synthesizing lignin-melamine resins                        | 50.0<br>(100 mA g <sup>-1</sup> ) | 90.5<br>(300 cycles, 500 mA g <sup>-1</sup> ) | 5000 mA g <sup>-1</sup> , 145 mAh g <sup>-1</sup> | 6    |
|                                 | carbon fibers as anode                  | organosolv (Alcell) lignin      | fabricating lignin-polyethylene oxide, nitrogen doping     | 82.8<br>(30 mA g <sup>-1</sup> )  | 91.8<br>(50 cycles, 30 mA g <sup>-1</sup> )   | 2000 mA g <sup>-1</sup> , 200 mAh g <sup>-1</sup> | 7    |
|                                 |                                         | with Alcel extraction process   | blending of lignin and polylactic acid                     | -                                 | -                                             | 10 C, 245 mAh g <sup>-1</sup>                     | 8    |
|                                 |                                         | water soluble alkali lignin     | lignin/poly (vinyl alcohol) polymer blends, KOH activation | 45.7<br>(10 mA g <sup>-1</sup> )  | 84.0<br>(900 cycles, 300 mA g <sup>-1</sup> ) | 1000 mA g <sup>-1</sup> , 75 mAh g <sup>-1</sup>  | 9    |

|  |                               |                             |                                                                             |                                   |                                                |                                                    |    |
|--|-------------------------------|-----------------------------|-----------------------------------------------------------------------------|-----------------------------------|------------------------------------------------|----------------------------------------------------|----|
|  |                               | extracted from black liquor | carbonization at different temperatures                                     | -                                 | 94.0<br>(-, 0.1 C)                             | 2 C, 88 mAh g <sup>-1</sup>                        | 10 |
|  |                               | without details             | embedding core-shell silicon/SiO <sub>2</sub>                               | -                                 | 80.0<br>(40 cycles, 0.2 C)                     | 0.2 C, 550 mAh g <sup>-1</sup>                     | 11 |
|  |                               | alkali lignin               | surface-functionalization with Fe <sub>2</sub> O <sub>3</sub> nanoparticles | 80.9<br>(50 mA g <sup>-1</sup> )  | 95.1<br>(80 cycles, 50 mA g <sup>-1</sup> )    | 200 mA g <sup>-1</sup> , 430 mAh g <sup>-1</sup>   | 12 |
|  | conductive framework of anode | lignosulfonate              | in-situ synthesizing MoS <sub>2</sub> @porous carbon nanospheres            | -                                 | 64.9<br>(50 cycles, 100 mA g <sup>-1</sup> )   | -                                                  | 13 |
|  |                               | sodium lignosulfonate       | in situ embedding NiO nanoparticles                                         | 84.9<br>(100 mA g <sup>-1</sup> ) | 95.8<br>(100 cycles, 100 mA g <sup>-1</sup> )  | 1000 mA g <sup>-1</sup> , 548 mAh g <sup>-1</sup>  | 14 |
|  |                               | without details             | forming functional conformal network crosslinking Si nano particles         | 62.0<br>(300 mA g <sup>-1</sup> ) | 89.0<br>(100 cycles, 300 mA g <sup>-1</sup> )  | 9000 mA g <sup>-1</sup> , 800 mAh g <sup>-1</sup>  | 15 |
|  | binder                        | kraft lignin                | a low-temperature heat treatment of the silicon-lignin composite, PEO added | 81.6<br>(100 mA g <sup>-1</sup> ) | 77.0<br>(100 cycles, 1000 mA g <sup>-1</sup> ) | 3600 mA g <sup>-1</sup> , 1500 mAh g <sup>-1</sup> | 16 |
|  |                               | kraft lignin                | heat treatment of micro-nano SiO <sub>x</sub> -lignin                       | 61.0<br>(100 mA g <sup>-1</sup> ) | -                                              | 1600 mA g <sup>-1</sup> , 584 mAh g <sup>-1</sup>  | 17 |
|  |                               | kraft lignin                | interconnected core-shell Si/C composite, PEO added                         | 71.6<br>(540 mA g <sup>-1</sup> ) | 89.3<br>(100 cycles, 540 mA g <sup>-1</sup> )  | 1440 mA g <sup>-1</sup> , 1133 mAh g <sup>-1</sup> | 18 |

|     |                                         |                                                           |                                                             |                                  |                                                  |                                                   |    |
|-----|-----------------------------------------|-----------------------------------------------------------|-------------------------------------------------------------|----------------------------------|--------------------------------------------------|---------------------------------------------------|----|
|     |                                         | alkali lignin                                             | lignin- <i>graft</i> -sodium polyacrylate                   | 91.0<br>(-)                      | -                                                | -                                                 | 19 |
|     |                                         | without details                                           | scavenging free radicals by lignin                          | -                                | 91.4<br>(1000 cycles, 150 mA g <sup>-1</sup> )   | 1500mA g <sup>-1</sup> , 97.2 mAh g <sup>-1</sup> | 20 |
| SIB | porous carbon as anode active materials | concentrated strong acid hydrolysis lignin                | carbonized at 1300°C                                        | 68.0<br>(50 mA g <sup>-1</sup> ) | 98.3<br>(500 cycles, 2500 mA g <sup>-1</sup> )   | 2500 mA g <sup>-1</sup> , 116 mAh g <sup>-1</sup> | 21 |
|     |                                         | collected from a delignification apparatus                | carbonized at 1300°C                                        | 69.0<br>(50 mA g <sup>-1</sup> ) | 99.9<br>(700 cycles, 300 mA g <sup>-1</sup> )    | 1000 mA g <sup>-1</sup> , 49 mAh g <sup>-1</sup>  | 22 |
|     |                                         | sodium lignin sulfonate                                   | spray drying process                                        | 88.3<br>(0.1 C)                  | 80.4%<br>(200 cycles, 1 C)                       | 2 C, 150 mAh g <sup>-1</sup>                      | 23 |
|     |                                         | collected from Shandong Longlive Bio-Technology Co., Ltd. | forming interpenetrating polymer networks                   | 82.0<br>(30 mA g <sup>-1</sup> ) | 90.0%<br>(150 cycles, 30 mA g <sup>-1</sup> )    | 600 mA g <sup>-1</sup> , 106 mAh g <sup>-1</sup>  | 24 |
|     |                                         | without details                                           | emulsification interaction between pitch and lignin         | 82.0<br>(30 mA g <sup>-1</sup> ) | 89.0%<br>(150 cycles, 30 mA g <sup>-1</sup> )    | 300 mA g <sup>-1</sup> , 162 mAh g <sup>-1</sup>  | 25 |
|     |                                         | alkali lignin                                             | nitrogen-doped, hard-template method                        | 20.0<br>(50 mA g <sup>-1</sup> ) | 92.0%<br>(1100 cycles, 1000 mA g <sup>-1</sup> ) | 6400 mA g <sup>-1</sup> , 48 mAh g <sup>-1</sup>  | 26 |
|     | carbon fibers as anode                  | kraft lignin                                              | well interacting between kraft lignin and cellulose acetate | 52.0<br>(50 mA g <sup>-1</sup> ) | -                                                | 500 mA g <sup>-1</sup> , 143 mAh g <sup>-1</sup>  | 27 |

|                   |                                     |                                     |                                                            |                                  |                                               |                                                  |    |
|-------------------|-------------------------------------|-------------------------------------|------------------------------------------------------------|----------------------------------|-----------------------------------------------|--------------------------------------------------|----|
|                   |                                     | water soluble alkali lignin         | lignin/poly (vinyl alcohol) polymer blends, KOH activation | 65.0<br>(10 mA g <sup>-1</sup> ) | -                                             | 500 mA g <sup>-1</sup> , 60 mAh g <sup>-1</sup>  | 9  |
|                   |                                     | lignosulfonate                      | fabricating polyacrylonitrile/lignin blend                 | 70.5<br>(20 mA g <sup>-1</sup> ) | 90.2<br>(200 cycles, 100 mA g <sup>-1</sup> ) | 1000 mA g <sup>-1</sup> , 80 mAh g <sup>-1</sup> | 28 |
|                   |                                     | kraft lignin                        | carbonization at varying temperatures                      | 89.0<br>(30 mA g <sup>-1</sup> ) | 94.0<br>(100 cycles, 100 mA g <sup>-1</sup> ) | -                                                | 29 |
| Li-S              | conductive framework of cathode     | without details                     | nitrogen-incorporated, KOH activation                      | -                                | 50.0<br>(600 cycles, 0.1 C)                   | 3.0 C, 208.3 mAh g <sup>-1</sup>                 | 30 |
|                   |                                     | cellulose enzyme residual lignin    | NaHCO <sub>3</sub> activation                              | -                                | 92.0<br>(200 cycles, 0.5 C)                   | 0.5 C, 1035 mAh g <sup>-1</sup>                  | 31 |
|                   |                                     | alkaline lignin                     | one-step carbonization/activation method                   | -                                | 64.8<br>(100 cycles, 0.5 C)                   | 2.0 C, 460.6 mAh g <sup>-1</sup>                 | 32 |
|                   | binder                              | lignosulfonate sodium salt          | the negatively charged sulfonate functional group          | -                                | 66.7<br>(100 cycles, 0.2 C)                   | 1.0 C, 710.0 mAh g <sup>-1</sup>                 | 33 |
|                   | modification materials of separator | sodium lignosulfonate               | negatively charged sulfonic groups                         | -                                | 74.0<br>(1000 cycles, 2.0 C)                  | 2.0 C, 707.0 mAh g <sup>-1</sup>                 | 34 |
|                   |                                     | extracted with benzenesulfonic acid | chemically alleviation of polysulfides                     | -                                | 65.2<br>(500 cycles, 1.0 C)                   | 2.0 C, 377.0 mAh g <sup>-1</sup>                 | 35 |
| Li-Se             | conductive framework of cathode     | commercial alkaline lignin          | KOH activation                                             | -                                | 76.0<br>(300 cycles, 0.5 C)                   | 4.0 C, 363.2 mAh g <sup>-1</sup>                 | 36 |
| Li-O <sub>2</sub> | conductive framework of cathode     | alkaline lignin                     | KOH, H <sub>3</sub> PO <sub>4</sub> , or steam activation  | -                                | -                                             | 0.2 mA g <sup>-1</sup> , 1.6 mAh g <sup>-1</sup> | 37 |

|                                        |                                          |                                                           |                                                                                                 |                 |                              |                                 |    |
|----------------------------------------|------------------------------------------|-----------------------------------------------------------|-------------------------------------------------------------------------------------------------|-----------------|------------------------------|---------------------------------|----|
| Li-NCM811                              | carbon membrane as framework of Li anode | collected from Shandong Longlive Bio-Technology Co., Ltd. | surface ozonolysis                                                                              | -               | 84.4<br>(135 cycles, 1.0 C)  | -                               | 38 |
| Li-NCM333                              | separator                                | without details                                           | lignin/polyvinyl alcohol blends                                                                 | 81.1<br>(0.1 C) | -                            | 5.0 C, 33.4 mAh g <sup>-1</sup> | 39 |
| Li-LiFePO <sub>4</sub>                 | separator                                | without details                                           | lignin/polyacrylonitrile composite                                                              | -               | 95.0<br>(50 cycles, 0.2 C)   | 8.0 C, 63.8 mAh g <sup>-1</sup> | 40 |
| Li-NCM523                              | modification materials of separator      | lignosulfonate                                            | in situ reacts between lignosulfonate and Li metal                                              | -               | 73.5<br>(100 cycles, 0.4 C)  | 2.0 C, 98.2 mAh g <sup>-1</sup> | 41 |
| Li-LiFePO <sub>4</sub>                 | electrolyte                              | without details                                           | mixing lignin and poly(N-vinylimidazole)-copoly(poly(ethylene glycol) methyl ether methacrylate | -               | ~99.0<br>(450 cycles, 1.0 C) | 10.0 C, 110 mAh g <sup>-1</sup> | 42 |
| Li-LiFePO <sub>4</sub>                 | electrolyte                              | gran lignin fiber                                         | forming uniform suspension                                                                      | -               | 97.7<br>(50 cycles, 0.2 C)   | 1.5 C, 129 mAh g <sup>-1</sup>  | 43 |
| all-solid-state Li-LiFePO <sub>4</sub> | electrolyte                              | organosolv lignin                                         | chemical modification and atom transfer radical polymerization                                  | -               | 99.2<br>(100 cycles, 1.0 C)  | 5.0 C, 120 mAh g <sup>-1</sup>  | 44 |

ICE: initial Coulombic efficiency

LIB: lithium-ion battery

SIB: sodium-ion battery

In the table, the electrochemical performances of LIB and SIB are collected from provided half cells.

## References:

1. W. Zhang, J. Yin, Z. Lin, H. Lin, H. Lu, Y. Wang and W. Huang, *Electrochim. Acta*, 2015, **176**, 1136–1142.
2. Y. Xi, S. Huang, D. Yang, X. Qiu, H. Su, C. Yi and Q. Li, *Green Chem.*, 2020, **22**, 4321–4330.
3. Y.-F. Du, G.-H. Sun, Y. Li, J.-Y. Cheng, J.-P. Chen, G. Song, Q.-Q. Kong, L.-J. Xie and C.-M. Chen, *Carbon*, 2021, **178**, 243–255.
4. Y. Xi, D. Yang, X. Qiu, H. Wang, J. Huang and Q. Li, *Ind. Crop. Prod.*, 2018, **124**, 747–754.
5. Z. W. He, Q. F. Lu and Q. Lin, *Bioresour. Technol.*, 2013, **127**, 66–71.
6. Z. Yang, H. Guo, F. Li, X. Li, Z. Wang, L. Cui and J. Wang, *J. Energy Chem.*, 2018, **27**, 1390–1396.
7. S. X. Wang, L. Yang, L. P. Stubbs, X. Li and C. He, *ACS Appl. Mater. Interfaces*, 2013, **5**, 12275–12282.
8. M. Culebras, H. Geaney, A. Beaucamp, P. Upadhyaya, E. Dalton, K. M. Ryan and M. N. Collins, *ChemSusChem*, 2019, **12**, 4516–4521.
9. E. Stojanovska, E. S. Pampal, A. Kilic, M. Quddus and Z. Candan, *Compos. Part. B-Eng.*, 2019, **158**, 239–248.
10. A. P. Nowak, J. Hagberg, S. Leijonmarck, H. Schweinebarth, D. Baker, A. Uhlin, P. Tomani and G. Lindbergh, *Holzforschung*, 2018, **72**, 81–90.
11. O. Rios, S. K. Martha, M. A. McGuire, W. Tenhaeff, K. More, C. Daniel and J. Nanda, *Energy Technol.*, 2014, **2**, 773–777.
12. X. Ma, A. L. Smirnova and H. Fong, *Mater. Sci. Eng. B-Adv.*, 2019, **241**, 100–104.
13. F. Chen, L. Wu, Z. Zhou, J. Ju, Z. Zhao, M. Zhong and T. Kuang, *Chin. Chem. Lett.*, 2019, **30**, 197–202.
14. Z. Zhou, F. Chen, T. Kuang, L. Chang, J. Yang, P. Fan, Z. Zhao and M. Zhong, *Electrochim. Acta*, 2018, **274**, 288–297.
15. X. Niu, J. Zhou, T. Qian, M. Wang and C. Yan, *Nanotechnology*, 2017, **28**, 405401.
16. T. Chen, Q. Zhang, J. Pan, J. Xu, Y. Liu, M. Al-Shroofy and Y. T. Cheng, *ACS Appl. Mater. Interfaces*, 2016, **8**, 32341–32348.
17. T. Chen, J. Hu, L. Zhang, J. Pan, Y. Liu and Y.-T. Cheng, *J. Power Sources*, 2017, **362**, 236–242.
18. T. Chen, Q. Zhang, J. Xu, J. Pan and Y.-T. Cheng, *RSC Adv.*, 2016, **6**, 29308–29313.
19. C. Luo, L. Du, W. Wu, H. Xu, G. Zhang, S. Li, C. Wang, Z. Lu and Y. Deng, *ACS Sustain. Chem. Eng.*, 2018, **6**, 12621–12629.
20. Y. Ma, K. Chen, J. Ma, G. Xu, S. Dong, B. Chen, J. Li, Z. Chen, X. Zhou and G. Cui, *Energ. Environ. Sci.*, 2019, **12**, 273–280.
21. D. Yoon, J. Hwang, W. Chang and J. Kim, *ACS Appl. Mater. Interfaces*, 2018, **10**, 569–581.

22. S. Alvin, D. Yoon, C. Chandra, H. S. Cahyadi, J.-H. Park, W. Chang, K. Y. Chung and J. Kim, *Carbon*, 2019, **145**, 67–81.
23. C. Li, Y. Sun, Q. Wu, X. Liang, C. Chen and H. Xiang, *Chem. Commun.*, 2020, **56**, 6078–6081.
24. H. Zhang, W. Zhang, H. Ming, J. Pang, H. Zhang, G. Cao and Y. Yang, *Chem. Eng. J.*, 2018, **341**, 280–288.
25. Y. Li, Y.-S. Hu, H. Li, L. Chen and X. Huang, *J. Mater. Chem. A*, 2016, **4**, 96–104.
26. L. Du, W. Wu, C. Luo, D. Xu, H. Guo, R. Wang, T. Zhang, J. Wang and Y. Deng, *J. Electrochem. Soc.*, 2019, **166**, A423–A428.
27. H. Jia, N. Sun, M. Dirican, Y. Li, C. Chen, P. Zhu, C. Yan, J. Zang, J. Guo, J. Tao, J. Wang, F. Tang and X. Zhang, *ACS Appl. Mater. Interfaces*, 2018, **10**, 44368–44375.
28. J. Jin, B.-j. Yu, Z.-q. Shi, C.-y. Wang and C.-b. Chong, *J. Power Sources*, 2014, **272**, 800–807.
29. K. Peuvot, O. Hosseinaei, P. Tomani, D. Zenkert and G. Lindbergh, *J. Electrochem. Soc.*, 2019, **166**, A1984–A1990.
30. J. S. Yeon, S. H. Park, J. Suk, H. Lee and H. S. Park, *Chem. Eng. J.*, 2020, **382**, 122946.
31. J. Xu, B. Liu, L. Wu, J. Hu, H. Hou and J. Yang, *Ind. Crop. Prod.*, 2019, **129**, 269–280.
32. F. Yu, Y. Li, M. Jia, T. Nan, H. Zhang, S. Zhao and Q. Shen, *J. Alloys Compd.*, 2017, **709**, 677–685.
33. J. Jeon, J.-K. Yoo, S. Yim, K. Jeon, G. H. Lee, J. H. Yun, D. K. Kim and Y. S. Jung, *ACS Sustain. Chem. Eng.*, 2019, **7**, 17580–17586.
34. T. Lei, W. Chen, W. Lv, J. Huang, J. Zhu, J. Chu, C. Yan, C. Wu, Y. Yan, W. He, J. Xiong, Y. Li, C. Yan, J. B. Goodenough and X. Duan, *Joule*, 2018, **2**, 2091–2104.
35. Z. Zhang, S. Yi, Y. Wei, H. Bian, R. Wang and Y. Min, *Polymers*, 2019, **11**, 1946.
36. H. Zhang, D. Jia, Z. Yang, F. Yu, Y. Su, D. Wang and Q. Shen, *Carbon*, 2017, **122**, 547–555.
37. G. Zhang, Y. Yao, T. Zhao, M. Wang and R. Chen, *ACS Appl. Mater. Interfaces*, 2020, **12**, 16521–16530.
38. L. Tao, Z. Xu, C. Kuai, X. Zheng, C. E. Wall, C. Jiang, A. R. Esker, Z. Zheng and F. Lin, *Energy Storage Mater.*, 2020, **24**, 129–137.
39. M.-J. Uddin, P. K. Alaboina, L. Zhang and S.-J. Cho, *Mater. Sci. Eng. B-Adv.*, 2017, **223**, 84–90.
40. M. Zhao, J. Wang, C. Chong, X. Yu, L. Wang and Z. Shi, *RSC Adv.*, 2015, **5**, 101115–101120.
41. J. Liu, R. Xu, C. Yan, H. Yuan, J.-F. Ding, Y. Xiao, T.-Q. Yuan and J.-Q. Huang, *Energy Storage Mater.*, 2020, **30**, 27–33.

42. S. Wang, L. Zhang, A. Wang, X. Liu, J. Chen, Z. Wang, Q. Zeng, H.-h. Zhou, X. Jiang and L. Zhang, *ACS Sustain. Chem. Eng.*, 2018, **6**, 14460–14469.
43. S.-D. Gong, Y. Huang, H.-J. Cao, Y.-H. Lin, Y. Li, S.-H. Tang, M.-S. Wang and X. Li, *J. Power Sources*, 2016, **307**, 624–633.
44. D. Jeong, J. Shim, H. Shin and J. C. Lee, *ChemSusChem*, 2020, **13**, 2642–2649.
